# Supplementary material for: Thermo-responsive rheological behavior of borinic acid polymer in dilute solution
Source: Royal Society of Chemistry journal article supplement (doi:10.1039/c6ra18117a), 2016-01-01
Supplement: c6ra18117a1.pdf [file c6ra18117a1.pdf]

## Supporting Information for

# Thermo-responsive Rheological Behavior of Borinic Acid Polymer in Dilute Solution

*X. L. Sun,<sup>a</sup> D. M. Liu,<sup>a</sup> X. H. Lv,<sup>a</sup> P. Zhou,<sup>a</sup> M. Sun,<sup>b</sup> W. M. Wan<sup>a\*</sup>*

- <sup>1</sup> State Key Laboratory of Heavy Oil Processing and Centre for Bioengineering and Biotechnology, China University of Petroleum (East China), 66 Changjiang West Road, Qingdao Economic Development Zone, Qingdao, Shandong, 266580, People's Republic of China.
- <sup>2</sup> Institute of Chemical Engineering and Materials, Yantai University, Yantai, 264005, China.

\* to whom correspondence should be addressed:

wanwenming@upc.edu.cn

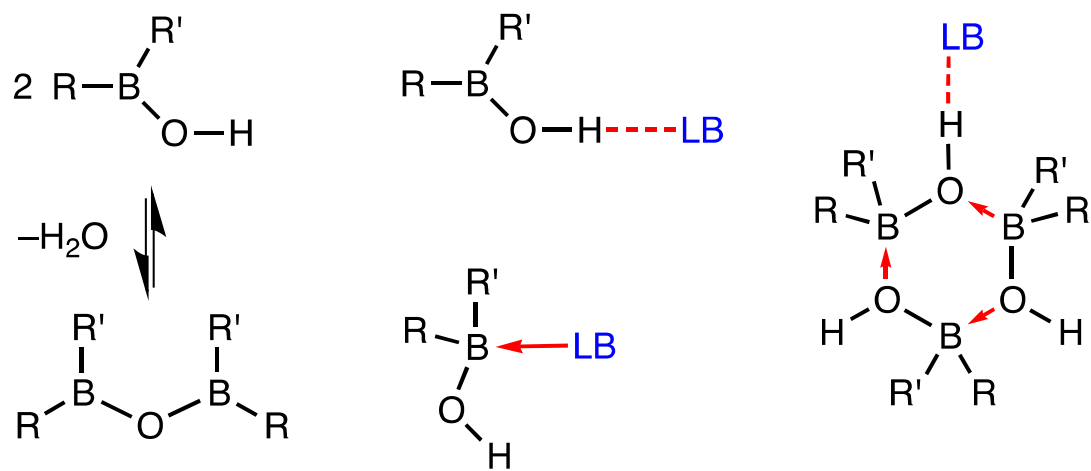

**Figure S1.** The illustration of dehydration of borinic acid compound. LB: Lewis base.

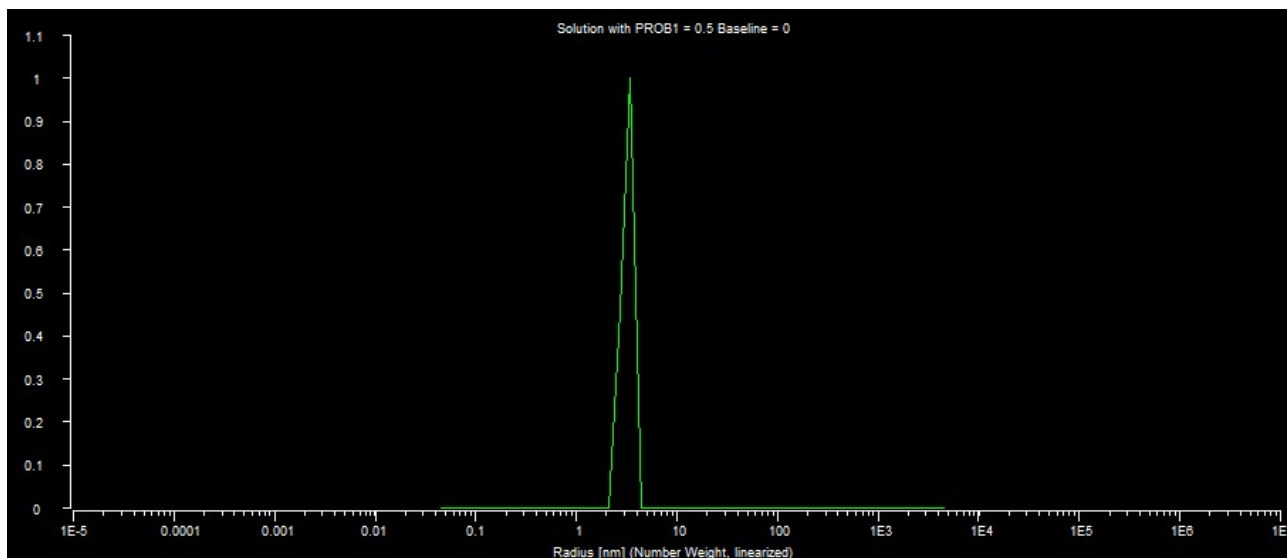

**Figure S2.** DLS result of PBA (0.1 wt%) in DMSO with 1% of H<sub>2</sub>O at 70 °C by ALV Goniometer System.

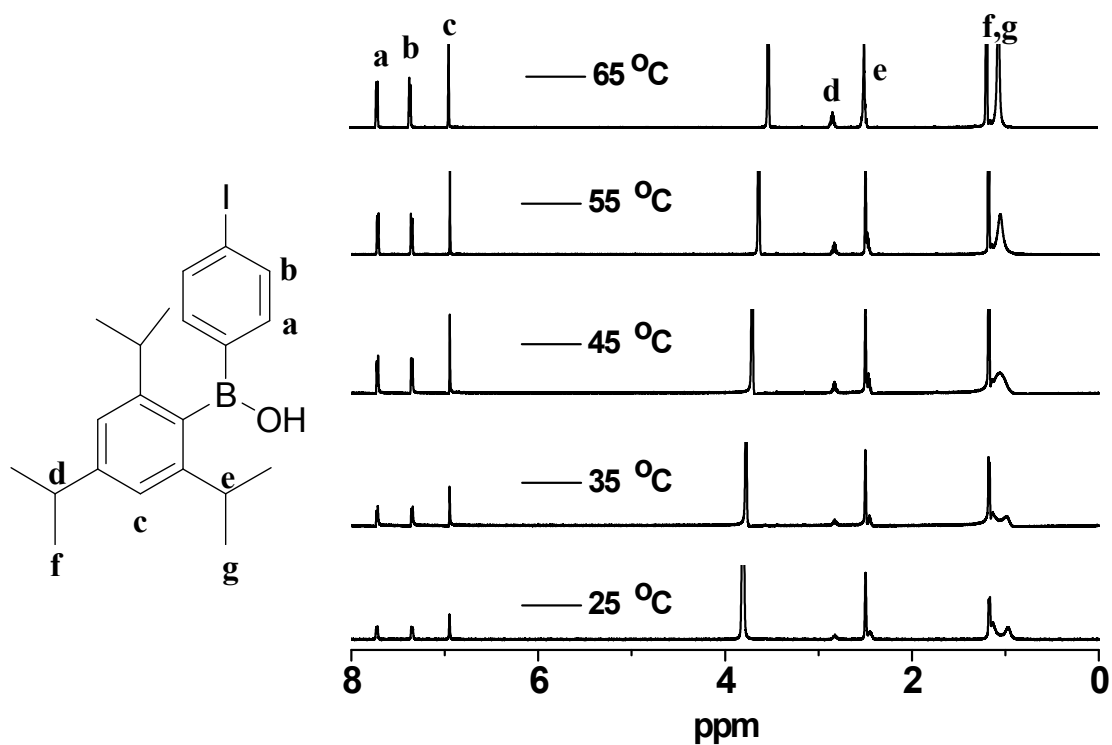

Figure S3. Temperature dependent  $^1\text{H}$  NMR spectra of borinic acid model compound in  $[\text{D}_6]\text{DMSO}$  with 1% of  $\text{D}_2\text{O}$  at different temperatures ranging from 65 °C, 55 °C, 45 °C, 35 °C to 25 °C, respectively.

Table S1.  $^1\text{H}$  NMR integrations of aromatic protons of borinic acid model compound in DMSO with 1% of  $\text{H}_2\text{O}$  at different temperatures. †

| Temperature/<br>$^{\circ}\text{C}$ | a-c  | a    | b    | c    |
|------------------------------------|------|------|------|------|
| 65                                 | 0.48 | 0.16 | 0.16 | 0.16 |
| 55                                 | 0.30 | 0.10 | 0.10 | 0.10 |
| 45                                 | 0.24 | 0.08 | 0.08 | 0.08 |
| 35                                 | 0.18 | 0.06 | 0.06 | 0.06 |
| 25                                 | 0.15 | 0.05 | 0.05 | 0.05 |
| Decrease ratio                     | 69%  | 69%  | 69%  | 69%  |

† The assignments of aromatic protons of borinic acid model compound are the same as the ones in Figure S3. All integrations were normalized by comparing with the integration of  $\text{H}_2\text{O}$ .

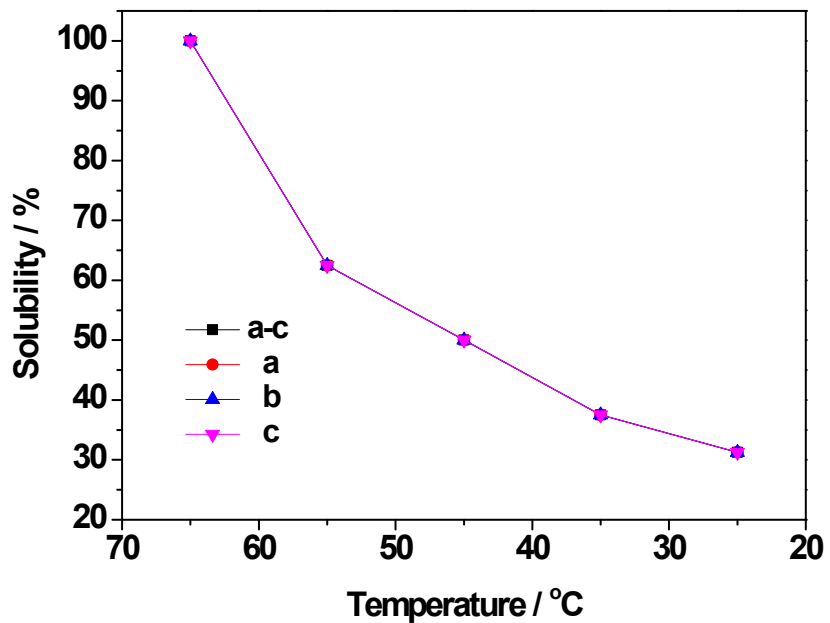

Figure S4. Temperature dependent  $^1\text{H}$  NMR integration decrease of aromatic protons of borinic acid model compound in  $[\text{D}_6]\text{DMSO}$  with 1% of  $\text{D}_2\text{O}$  at different temperatures ranging from 65 °C, 55 °C, 45 °C, 35 °C to 25 °C, respectively. The assignments of aromatic protons of borinic acid model compound are the same as the ones in Figure S3.
